# Supplementary material for: De novo draft assembly of the Botrylloides leachii genome provides further insight into tunicate evolution
Source: PubMed Central journal article supplement (PMC5882950; doi:10.1038/s41598-018-23749-w), 2018-04-03
Supplement: 41598_2018_23749_MOESM1_ESM.pdf [file 41598_2018_23749_MOESM1_ESM.pdf]

***De novo* draft assembly of the *Botrylloides leachii* genome  
provides further insight into tunicate evolution.**

Simon Blanchoud, Kim Rutherford, Lisa Zondag, Neil J. Gemmell and Megan J. Wilson

## Supplementary Figures

**Figure S1.** *B. leachii* has a genome well suited for *de novo* assembly. (A) Quality check results for the sequencing libraries. (B) de Bruijn graph quantification presenting the computational complexity of the assembly.

**Figure S2.** Gene Ontology terms identified in the orthologs clusters (A) shared by colonial botryllids, (B) shared by all analyzed tunicates, (C) shared by the sessile tunicates, (D) specific to *B. schlosseri* and (E) specific to *O. dioica*. The names of the species included in a given group are written above each REVIGO table.

**Figure S3.** Duplication of *Wnt5a* genes in tunicate genomes. Genomic representation of the intron-exon structure of *Wnt5-like* genes within each indicated genome. Note that no *Wnt5a* ortholog is present in the *O. dioica* genome. Major ticks indicate 1 Mb, minor ticks 100 bp and double-parallel lines a gap of > 1 Mb.

**Figure S4.** Tunicate genes for (A) the Notch signalling pathway and (B) the Retinoic Acid signalling pathway.

**Figure S5.** Protein sequence alignments used to generate the phylogenies presented in the main text. (A) Alignment for the Notch signalling pathway shown in Fig. 7. (B) Alignment for the Retinoic Acid signalling pathway shown in Fig. 8.

## Supplementary Files

**File S1.** BUSCO results for the *B. leachii* genome.

**File S2.** Repetitive elements identified by RepeatMasker using *de novo* repeat libraries for the genomes of *B. leachii*, *B. schlosseri*, *C. robusta*, *O. dioica* and *M. oculata*.

**File S3.** Zip folder containing the results from the tunicate orthologs analysis including gene clustering, multiple sequence alignments, consensus protein sequences and BLASTp hits. A README.txt file provides further details on the content of each file. This is available to download at <http://wilsonlab.otago.ac.nz/projects/genome>.

**File S4.** GOrilla and REVIGO results used for GO term overrepresentation analysis in the orthologs group between the *B. leachii* and *B. schlosseri* genomes.

**File S5.** Gene IDs and corresponding transcript IDs (see Zondag *et al.*, 2016) for genes of interest. This table includes accession numbers for the protein sequences used in phylogeny construction (Fig. 7 and 8).

## Supplementary Tables

**Table S1.** Quality metrics of the iterative meta-assembly approach followed for the *de novo* assembly of the *B. leachii* genome.

**Table S2.** Conserved domains used to identify the corresponding proteins in tunicate genomes.

# A

## Adapter Content

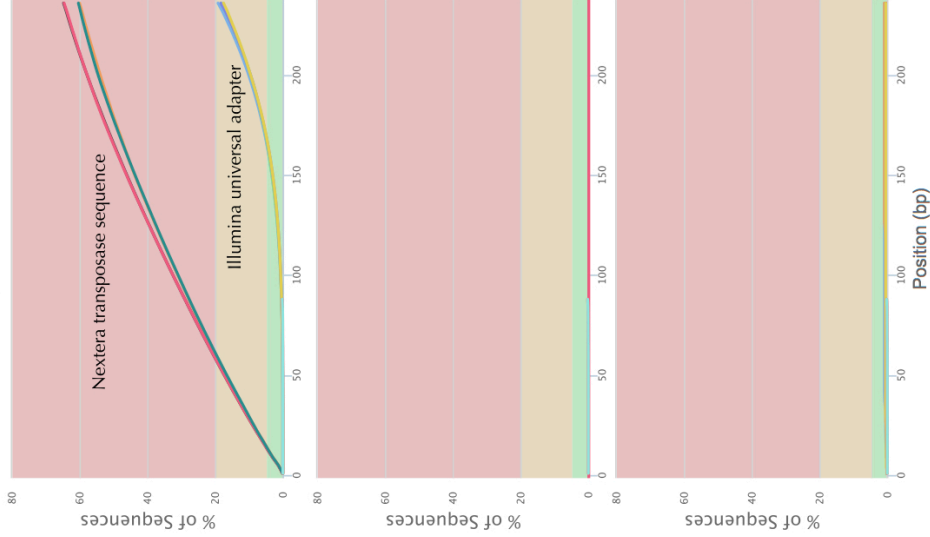

## Per Sequence Quality Scores

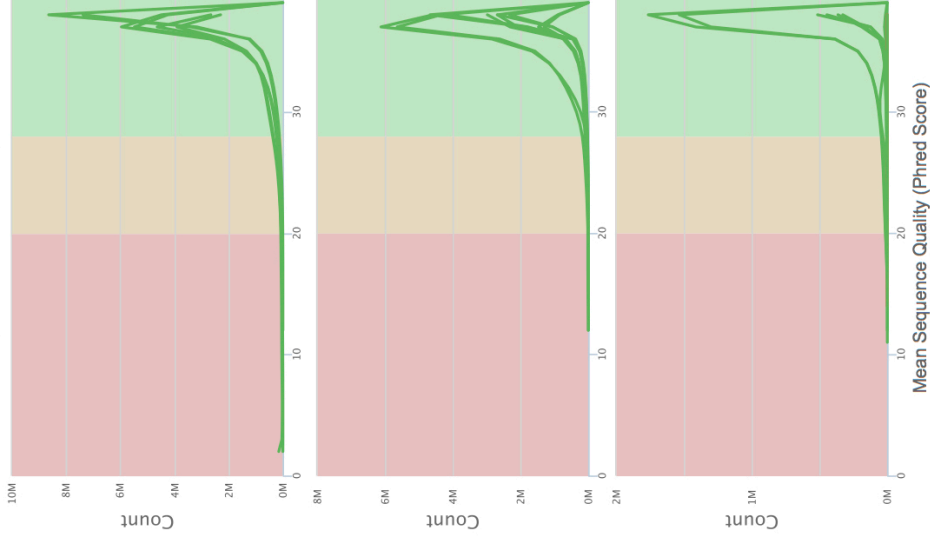

## Mean Quality Scores

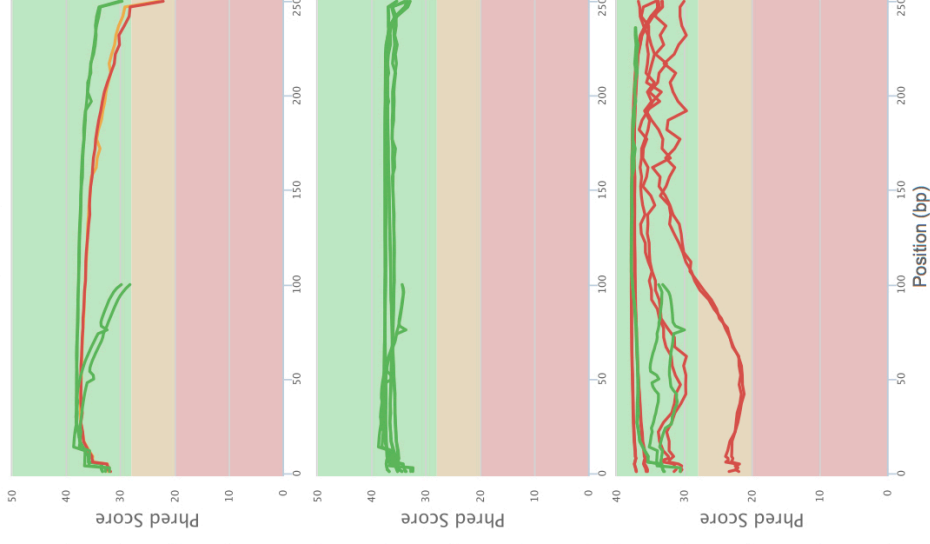

## Per Sequence GC Content

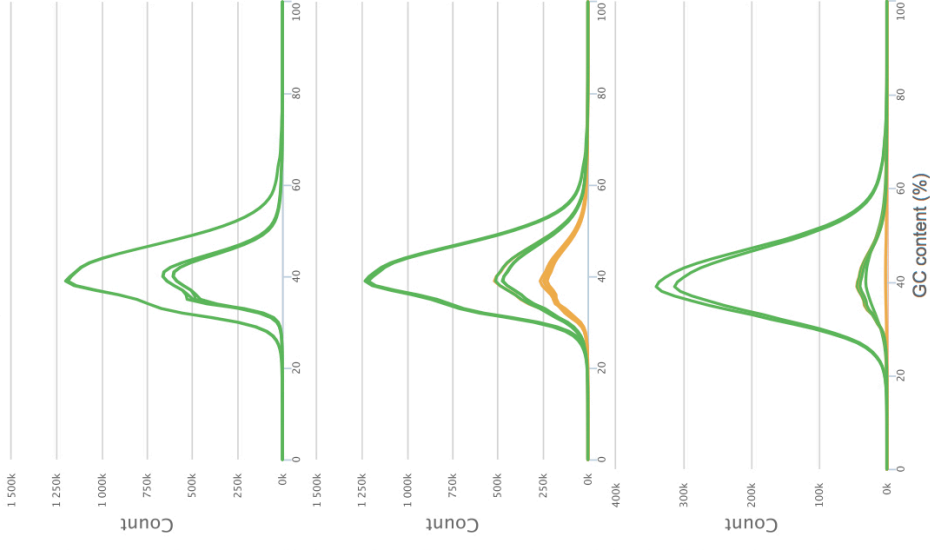

# B

## variant branches in k-de Bruijn graph

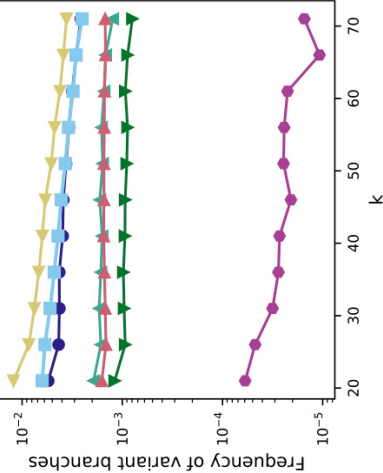

## repeat branches in k-de Bruijn graph

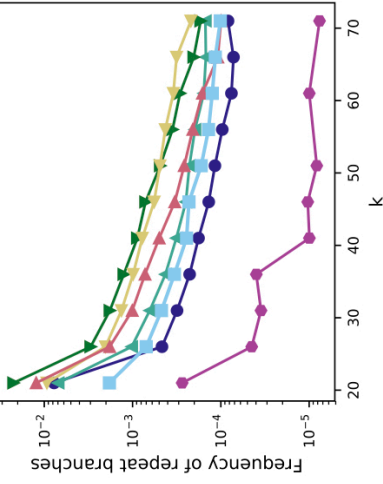

## error branches in k-de Bruijn graph

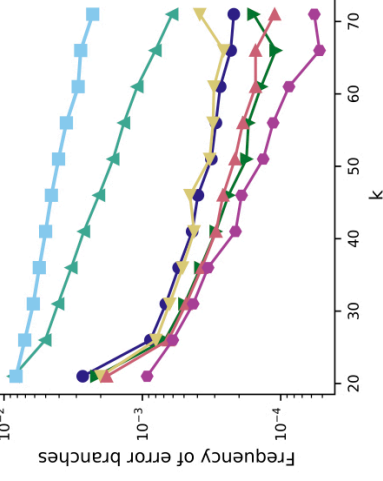

## 51-mer count distribution

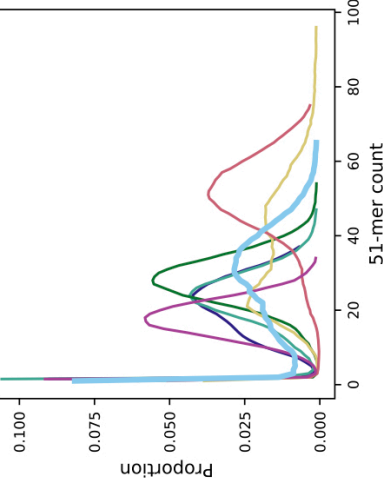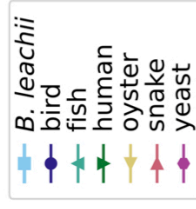

**A**

**B. leachii, B. schlosseri**

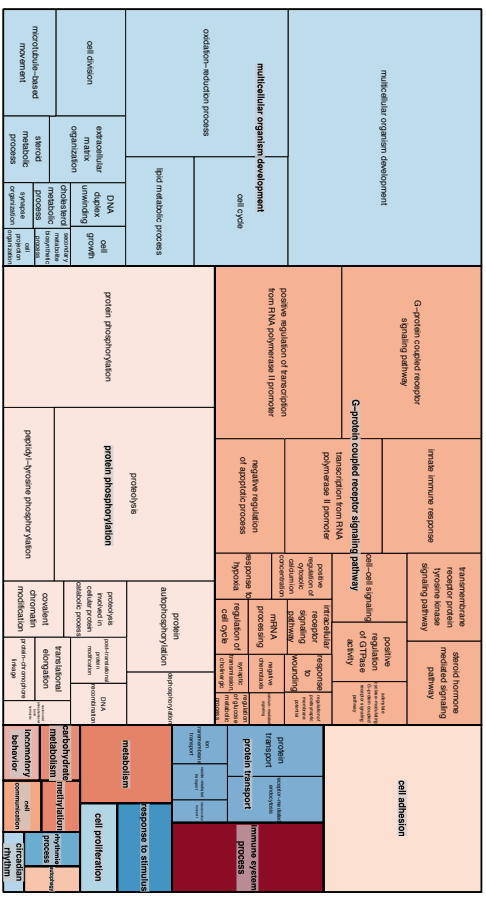

**B. B. leachii, B. schlosseri, C. intestinalis, M. oculata, O. dioica**

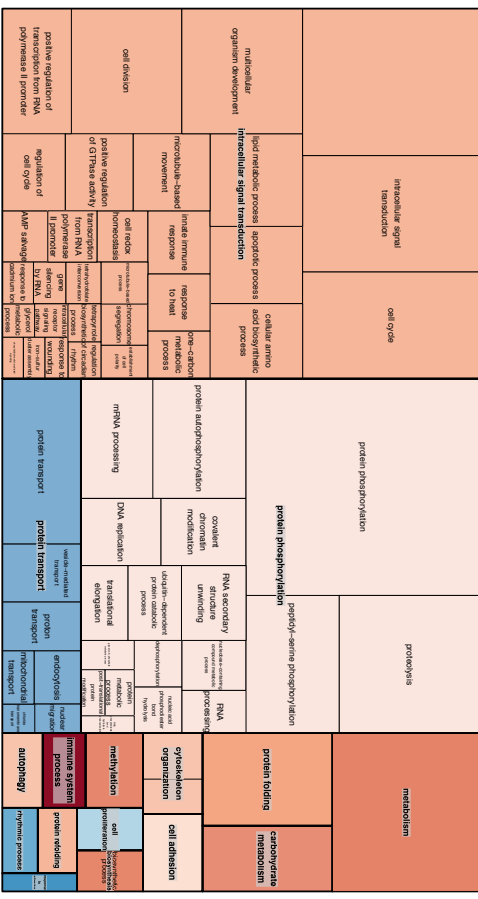

**B. schlosseri**

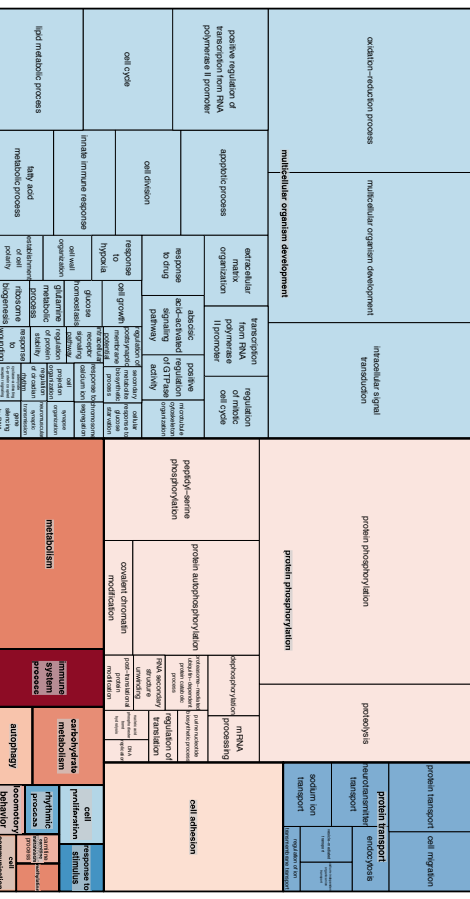

**biological process**

- reproduction [GO:0000013](#)
- immune system process [GO:0002576](#)
- catalytic activity [GO:0003824](#)
- transporter activity [GO:0005313](#)
- behavior [GO:0007590](#)
- metabolic process [GO:0008152](#)
- cellular process [GO:0002510](#)
- biological adhesion [GO:0033032](#)
- signaling [GO:0003052](#)
- multicellular organismal process [GO:0032501](#)
- developmental process [GO:0032502](#)
- growth [GO:0040007](#)
- locomotion [GO:0040011](#)
- single-organism process [GO:0044609](#)
- biological phase [GO:0044488](#)
- rhythmic process [GO:0048511](#)
- response to stimulus [GO:0008996](#)
- localization [GO:0031779](#)
- multi-organism process [GO:0047191](#)
- biological regulation [GO:0005307](#)
- biogenesis [GO:0071840](#)

**C B. leachii, B. schlosseri, C. intestinalis, M. oculata**

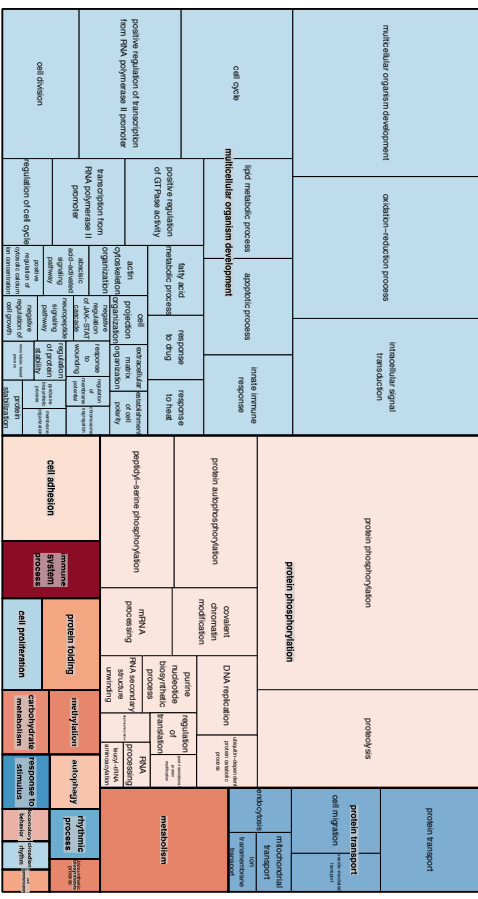

**O. dioica**

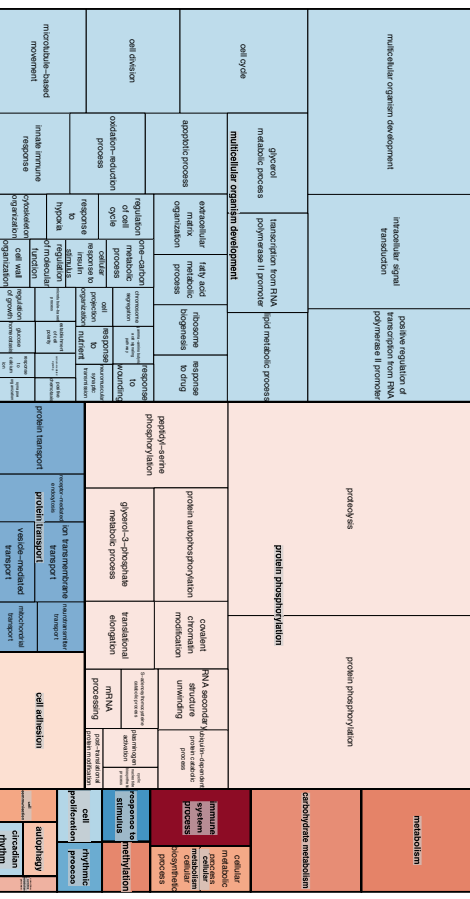

## *C. robusta*

**KhL152:33570-53570 bp**

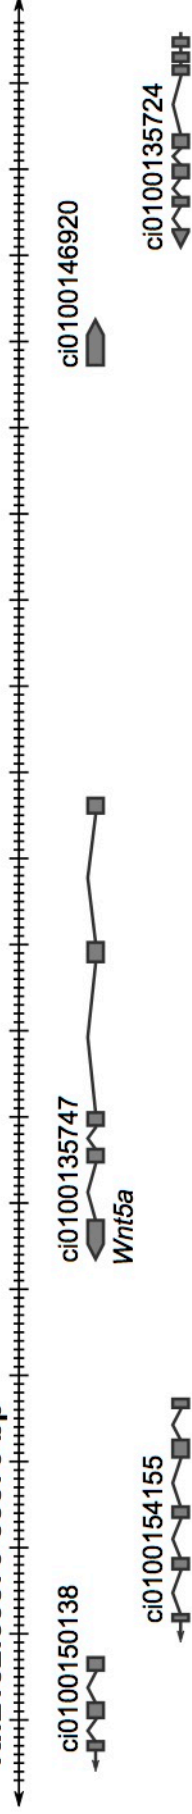

## *B. leachii*

**S16:486149-586149 bp**

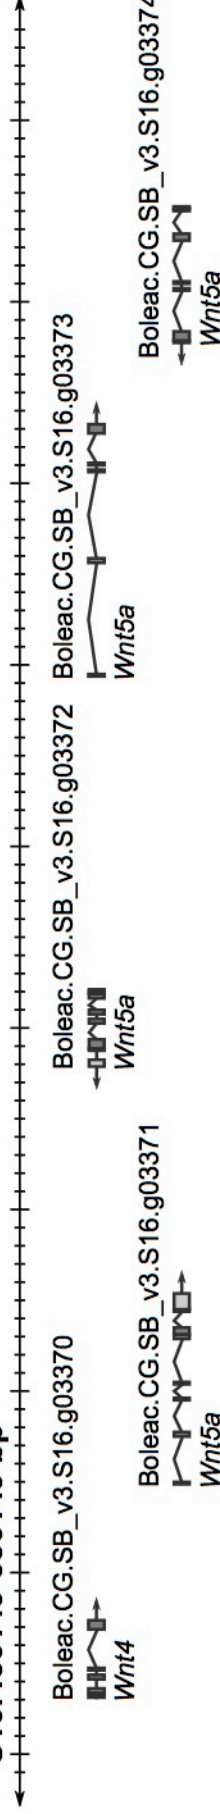

## *B. schlosseri*

**chr13:4585464-102569 bp**

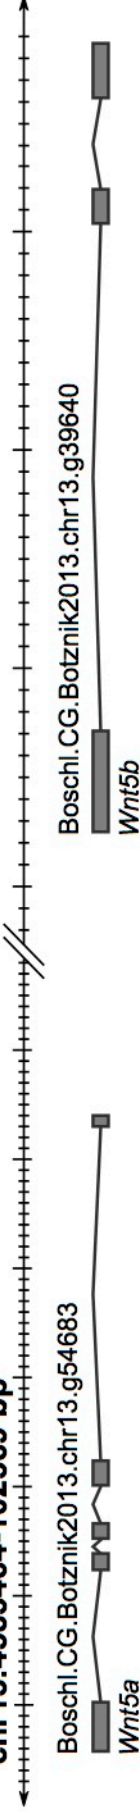

**chr12:3510132-16997000 bp**

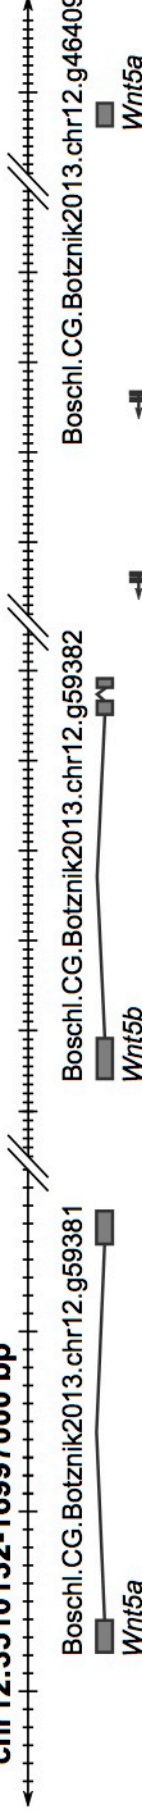

**chrUn:322053291-397030599 bp**

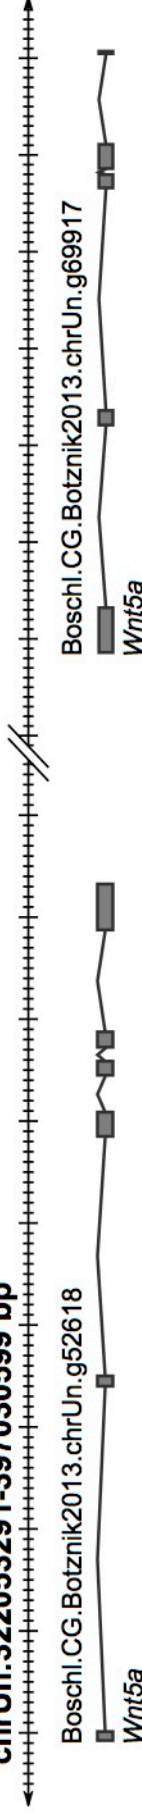

## *M. oculata*

**S87006:6779-26779 bp**

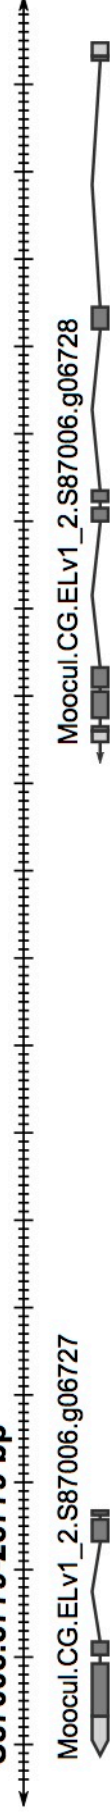

**A*****C. robusta***

Notch DSL DSL

***B. leachii***Notch DSL DSL  
DSL***B. schlosseri***

Notch DSL

***O. dioica***

Notch DSL

***M. oculata***

Notch DSL

**B*****C. robusta***Cyp26 Cyp26 RXR RXR RXR  
Rdh10 Rdh16  
Aldh1a/b  
Aldh1a/b  
Aldh1a/b  
Aldh1a/b***B. leachii***Cyp26 Cyp26 Cyp26 Cyp26 RXR RXR RXR  
Rdh10 Rdh16 RdhE2  
Aldh1a/b  
Aldh1a/b  
Aldh1a/b***B. schlosseri***Cyp26 Cyp26 Cyp26 Cyp26 RXR RXR RXR  
Rdh10 Rdh16 RdhE2  
Aldh1a/b  
Aldh1a/b***O. dioica***RXR  
RdhE2 RdhE2  
RdhE2 RdhE2***M. oculata***Cyp26 RXR RXR RXR  
Rdh10 Rdh16 RdhE2  
Rdh10 Rdh16  
Aldh1a/b  
Aldh1a/b  
Aldh1a/b





**Table S1. Quality metrics of the iterative meta-assembly approach followed for the *de novo* assembly of the *B. leachii* genome.** At the end of each round, the assemblies were ranked (see values in brackets), and these assemblies were then combined following the order of their rank. Note that the BUSCO and Glimmer scores were obtained using the default species model, not using the model trained specifically for *B. leachii*. “Mate-pair size” refers to the average length of the mate-pair library used by Metassembler. Assembly “3 kb” from round 3 (in bold) was chosen as the final draft genome.

Round 1

| Assembler        | N50 [rank] | BUSCO [rank] | Glimmer (all / >1.5 kb) [rank] |
|------------------|------------|--------------|--------------------------------|
| AbySS            | 864 [4]    | 473 [3]      | 36953 / 6085 [2]               |
| ALLPATHS-LG      | 45148 [1]  | 603 [1]      | 25933 / 8686 [3]               |
| MaSuRCA_filtered | 3060 [2]   | 500 [2]      | 54586 / 7121 [1]               |
| MaSuRCA          | 974 [3]    | 78 [6]       | 21907 / 664 [6]                |
| SOAPdenovo2      | 250 [6]    | 161 [5]      | 35832 / 1332 [5]               |
| Velvet           | 598 [5]    | 380 [4]      | 35021 / 3297 [4]               |

Round 2

| Ranking used | N50   | BUSCO | Glimmer (all / >1.5 kb) | STAR [rank] |
|--------------|-------|-------|-------------------------|-------------|
| N50          | 47795 | 611   | 24051 / 8575            | 20537 [2]   |
| BUSCO        | 45481 | 607   | 25170 / 8702            | 20618 [1]   |
| Glimmer      | 11860 | 617   | 24375 / 8240            | 17487 [3]   |

Round 3

| Mate-pair size [chosen] | N50          | BUSCO      | Glimmer             | STAR         |
|-------------------------|--------------|------------|---------------------|--------------|
| <b>3 kb [X]</b>         | <b>48085</b> | <b>616</b> | <b>23618 / 8486</b> | <b>20509</b> |
| 8 kb                    | 48702        | 612        | 23534 / 8459        | 9488         |
| 15 kb                   | 46966        | 611        | 23662 / 8505        | 20541        |

**Table S2.** Conserved domains used to identify the corresponding proteins in tunicate genomes.

| <b>Conserved protein domain family</b>     | <b>Accession ID</b> |
|--------------------------------------------|---------------------|
| Delta serrate ligand protein domain        | Pfam01414           |
| Notch LNR (lin-notch repeat)               | Pfam00066           |
| Wnt                                        | Pfam00110           |
| DIX (dishevelled)                          | Pfam00778           |
| Cytochrome p450                            | Pfam00067           |
| 17 $\beta$ -HSDXI-like SDR (dehydrogenase) | Cd05339             |
| NR_LBD_RAR                                 | Cd06937             |
| CRD_TK_ROR_like                            | Cd07459             |
| Aldh-SF                                    | cl11961             |
| SOX-TCF_HMG box                            | Cd01388             |
| PTKc_Src                                   | Cd05071             |
